# Supplementary material for: Distinguishing potential bacteria-tumor associations from contamination in a secondary data analysis of public cancer genome sequence data
Source: Springer Nature journal article supplement (doi:10.1186/s40168-016-0224-8), 2017-01-25
Supplement: 40168_2016_224_MOESM1_ESM.pdf [file 40168_2016_224_MOESM1_ESM.pdf]

### BWA Mapping

### RefSeq database with all complete bacterial genomes

### BWA Mapped

### Operational taxonomic unit

Bacterial Read 1

|                              |                                                                         | Kingdom | Phylum          | Class                 | Order                   | Family                 | Genus                   | Species              | Strain                                                          |
|------------------------------|-------------------------------------------------------------------------|---------|-----------------|-----------------------|-------------------------|------------------------|-------------------------|----------------------|-----------------------------------------------------------------|
| gi 169794206 ref NC_010410.1 | <i>Acinetobacter baumannii</i> AYE                                      | N       | Bacteria        | Proteobacteria        | γ-proteobacteria        | Pseudomonadales        | Moraxellaceae           | <i>Acinetobacter</i> | <i>Acinetobacter baumannii</i> AYE                              |
| gi 126640115 ref NC_009085.1 | <i>Acinetobacter baumannii</i> ATCC 17978                               | N       | Bacteria        | Proteobacteria        | γ-proteobacteria        | Pseudomonadales        | Moraxellaceae           | <i>Acinetobacter</i> | <i>Acinetobacter baumannii</i> ATCC 17978                       |
| gi 159184118 ref NC_003062.2 | <i>Agrobacterium tumefaciens</i> str. C58 chromosome circular           | N       | Bacteria        | Proteobacteria        | α-proteobacteria        | Rhizobiales            | Rhizobiaceae            | <i>Agrobacterium</i> | <i>Agrobacterium fabrum</i> str. C58, chromosome circular       |
| gi 159185562 ref NC_003063.2 | <i>Agrobacterium tumefaciens</i> str. C58 chromosome linear             | N       | Bacteria        | Proteobacteria        | α-proteobacteria        | Rhizobiales            | Rhizobiaceae            | <i>Agrobacterium</i> | <i>Agrobacterium fabrum</i> str. C58, chromosome linear         |
| gi 33598993 ref NC_002927.3  | <i>Bordetella bronchiseptica</i> RB50                                   | N       | Bacteria        | Proteobacteria        | β-proteobacteria        | Burkholderiales        | Alcaligenaceae          | <i>Bordetella</i>    | <i>Bordetella bronchiseptica</i> RB50                           |
| gi 115350056 ref NC_008390.1 | <i>Burkholderia ambifaria</i> AMMD chromosome 1                         | N       | Bacteria        | Proteobacteria        | β-proteobacteria        | Burkholderiales        | Burkholderiaceae        | <i>Burkholderia</i>  | <i>Burkholderia ambifaria</i> AMMD chromosome 1                 |
| gi 296100371 ref NC_014121.1 | <i>Enterobacter cloacae</i> subsp. <i>cloacae</i> ATCC 13047 chromosome | N       | Bacteria        | Proteobacteria        | γ-proteobacteria        | Enterobactirales       | Enterobacteriaceae      | <i>Enterobacter</i>  | <i>Enterobacter cloacae</i> subsp. <i>cloacae</i> ATCC 13047    |
| gi 117622295 ref NC_008563.1 | <i>Escherichia coli</i> APEC O1                                         | N       | Bacteria        | Proteobacteria        | γ-proteobacteria        | Enterobactirales       | Enterobacteriaceae      | <i>Escherichia</i>   | <i>Escherichia coli</i> APEC O1                                 |
| gi 91209055 ref NC_007946.1  | <i>Escherichia coli</i> UTI89                                           | N       | Bacteria        | Proteobacteria        | γ-proteobacteria        | Enterobactirales       | Enterobacteriaceae      | <i>Escherichia</i>   | <i>Escherichia coli</i> UTI89                                   |
| gi 187930913 ref NC_010677.1 | <i>Francisella tularensis</i> subsp. <i>mediasiatica</i> FSC147         | N       | Bacteria        | Proteobacteria        | γ-proteobacteria        | Thiotrichales          | Francisellaceae         | <i>Francisella</i>   | <i>Francisella tularensis</i> subsp. <i>mediasiatica</i> FSC147 |
| gi 162960935 ref NC_007146.2 | <i>Haemophilus influenzae</i> 86-028NP                                  | N       | Bacteria        | Proteobacteria        | γ-proteobacteria        | Pasteurellales         | Pasteurellaceae         | <i>Haemophilus</i>   | <i>Haemophilus influenzae</i> 86-028NP                          |
| gi 15611071 ref NC_000921.1  | <i>Helicobacter pylori</i> J99                                          | N       | Bacteria        | Proteobacteria        | ε-proteobacteria        | Campylobacteriales     | Helicobacteraceae       | <i>Helicobacter</i>  | <i>Helicobacter pylori</i> J99                                  |
| gi 116332681 ref NC_008497.1 | <i>Lactobacillus brevis</i> ATCC 367                                    | N       | Bacteria        | Firmicutes            | Bacilli                 | Lactobacillales        | Lactobacillaceae        | <i>Lactobacillus</i> | <i>Lactobacillus brevis</i> ATCC 367                            |
| gi 54295983 ref NC_006368.1  | <i>Legionella pneumophila</i> str. Paris                                | N       | Bacteria        | Proteobacteria        | γ-proteobacteria        | Legionellales          | Legionellaceae          | <i>Legionella</i>    | <i>Pseudomonas fluorescens</i> SBW25                            |
| gi 284800255 ref NC_013766.1 | <i>Listeria monocytogenes</i> 08-5578                                   | N       | Bacteria        | Firmicutes            | Bacilli                 | Bacillales             | Listeriaceae            | <i>Listeria</i>      | <i>Listeria monocytogenes</i> 08-5578                           |
| gi 148821191 ref NC_009565.1 | <i>Mycobacterium tuberculosis</i> F11                                   | N       | Bacteria        | Actinobacteria        | Actinobacteridae        | Actinomycetales        | Mycobacteriaceae        | <i>Mycobacterium</i> | <i>Mycobacterium tuberculosis</i> F11                           |
| gi 194097589 ref NC_011035.1 | <i>Neisseria gonorrhoeae</i> NCCP11945                                  | N       | Bacteria        | Proteobacteria        | β-proteobacteria        | Neisseriales           | Neisseriaceae           | <i>Neisseria</i>     | <i>Neisseria gonorrhoeae</i> NCCP11945                          |
| gi 229587578 ref NC_012660.1 | <i>Pseudomonas fluorescens</i> SBW25                                    | Y       | <b>Bacteria</b> | <b>Proteobacteria</b> | <b>γ-proteobacteria</b> | <b>Pseudomonadales</b> | <b>Pseudomonadaceae</b> | <b>Pseudomonas</b>   | <b><i>Pseudomonas fluorescens</i> SBW25</b>                     |
| gi 21888746 ref NC_011770.1  | <i>Pseudomonas aeruginosa</i> LESB58                                    | Y       | <b>Bacteria</b> | <b>Proteobacteria</b> | <b>γ-proteobacteria</b> | <b>Pseudomonadales</b> | <b>Pseudomonadaceae</b> | <b>Pseudomonas</b>   | <b><i>Pseudomonas aeruginosa</i> LESB58</b>                     |
| gi 229586230 ref NC_012633.1 | <i>Rickettsia africae</i> ESF-5 chromosome                              | N       | Bacteria        | Proteobacteria        | α-proteobacteria        | Rickettsiales          | Rickettsiaceae          | <i>Rickettsia</i>    | <i>Rickettsia africae</i> ESF-5                                 |
| gi 116515308 ref NC_008533.1 | <i>Streptococcus pneumoniae</i> D39                                     | N       | Bacteria        | Firmicutes            | Bacilli                 | Lactobacillales        | Streptococcaceae        | <i>Streptococcus</i> | <i>Streptococcus pneumoniae</i> D39                             |
| gi 42519920 ref NC_002978.6  | <i>Wolbachia</i> endosymbiont of <i>Drosophila melanogaster</i>         | N       | Bacteria        | Proteobacteria        | α-proteobacteria        | Rickettsiales          | Anaplasmataceae         | <i>Wolbachia</i>     | <i>Wolbachia</i> endosymbiont of <i>Drosophila melanogaster</i> |
| ...                          |                                                                         |         |                 |                       |                         |                        |                         |                      |                                                                 |

Bacterial Read 2

|                              |                                                                         | Kingdom | Phylum          | Class                 | Order                   | Family                 | Genus                   | Species              | Strain                                                          |
|------------------------------|-------------------------------------------------------------------------|---------|-----------------|-----------------------|-------------------------|------------------------|-------------------------|----------------------|-----------------------------------------------------------------|
| gi 169794206 ref NC_010410.1 | <i>Acinetobacter baumannii</i> AYE                                      | N       | Bacteria        | Proteobacteria        | γ-proteobacteria        | Pseudomonadales        | Moraxellaceae           | <i>Acinetobacter</i> | <i>Acinetobacter baumannii</i> AYE                              |
| gi 126640115 ref NC_009085.1 | <i>Acinetobacter baumannii</i> ATCC 17978                               | N       | Bacteria        | Proteobacteria        | γ-proteobacteria        | Pseudomonadales        | Moraxellaceae           | <i>Acinetobacter</i> | <i>Acinetobacter baumannii</i> ATCC 17978                       |
| gi 159184118 ref NC_003062.2 | <i>Agrobacterium tumefaciens</i> str. C58 chromosome circular           | N       | Bacteria        | Proteobacteria        | α-proteobacteria        | Rhizobiales            | Rhizobiaceae            | <i>Agrobacterium</i> | <i>Agrobacterium fabrum</i> str. C58, chromosome circular       |
| gi 159185562 ref NC_003063.2 | <i>Agrobacterium tumefaciens</i> str. C58 chromosome linear             | N       | Bacteria        | Proteobacteria        | α-proteobacteria        | Rhizobiales            | Rhizobiaceae            | <i>Agrobacterium</i> | <i>Agrobacterium fabrum</i> str. C58, chromosome linear         |
| gi 33598993 ref NC_002927.3  | <i>Bordetella bronchiseptica</i> RB50                                   | N       | Bacteria        | Proteobacteria        | β-proteobacteria        | Burkholderiales        | Alcaligenaceae          | <i>Bordetella</i>    | <i>Bordetella bronchiseptica</i> RB50                           |
| gi 115350056 ref NC_008390.1 | <i>Burkholderia ambifaria</i> AMMD chromosome 1                         | N       | Bacteria        | Proteobacteria        | β-proteobacteria        | Burkholderiales        | Burkholderiaceae        | <i>Burkholderia</i>  | <i>Burkholderia ambifaria</i> AMMD chromosome 1                 |
| gi 296100371 ref NC_014121.1 | <i>Enterobacter cloacae</i> subsp. <i>cloacae</i> ATCC 13047 chromosome | N       | Bacteria        | Proteobacteria        | γ-proteobacteria        | Enterobactirales       | Enterobacteriaceae      | <i>Enterobacter</i>  | <i>Enterobacter cloacae</i> subsp. <i>cloacae</i> ATCC 13047    |
| gi 117622295 ref NC_008563.1 | <i>Escherichia coli</i> APEC O1                                         | N       | Bacteria        | Proteobacteria        | γ-proteobacteria        | Enterobactirales       | Enterobacteriaceae      | <i>Escherichia</i>   | <i>Escherichia coli</i> APEC O1                                 |
| gi 91209055 ref NC_007946.1  | <i>Escherichia coli</i> UTI89                                           | N       | Bacteria        | Proteobacteria        | γ-proteobacteria        | Enterobactirales       | Enterobacteriaceae      | <i>Escherichia</i>   | <i>Escherichia coli</i> UTI89                                   |
| gi 187930913 ref NC_010677.1 | <i>Francisella tularensis</i> subsp. <i>mediasiatica</i> FSC147         | N       | Bacteria        | Proteobacteria        | γ-proteobacteria        | Thiotrichales          | Francisellaceae         | <i>Francisella</i>   | <i>Francisella tularensis</i> subsp. <i>mediasiatica</i> FSC147 |
| gi 162960935 ref NC_007146.2 | <i>Haemophilus influenzae</i> 86-028NP                                  | N       | Bacteria        | Proteobacteria        | γ-proteobacteria        | Pasteurellales         | Pasteurellaceae         | <i>Haemophilus</i>   | <i>Haemophilus influenzae</i> 86-028NP                          |
| gi 15611071 ref NC_000921.1  | <i>Helicobacter pylori</i> J99                                          | N       | Bacteria        | Proteobacteria        | ε-proteobacteria        | Campylobacteriales     | Helicobacteraceae       | <i>Helicobacter</i>  | <i>Helicobacter pylori</i> J99                                  |
| gi 116332681 ref NC_008497.1 | <i>Lactobacillus brevis</i> ATCC 367                                    | N       | Bacteria        | Firmicutes            | Bacilli                 | Lactobacillales        | Lactobacillaceae        | <i>Lactobacillus</i> | <i>Lactobacillus brevis</i> ATCC 367                            |
| gi 54295983 ref NC_006368.1  | <i>Legionella pneumophila</i> str. Paris                                | N       | Bacteria        | Proteobacteria        | γ-proteobacteria        | Legionellales          | Legionellaceae          | <i>Legionella</i>    | <i>Pseudomonas fluorescens</i> SBW25                            |
| gi 284800255 ref NC_013766.1 | <i>Listeria monocytogenes</i> 08-5578                                   | N       | Bacteria        | Firmicutes            | Bacilli                 | Bacillales             | Listeriaceae            | <i>Listeria</i>      | <i>Listeria monocytogenes</i> 08-5578                           |
| gi 148821191 ref NC_009565.1 | <i>Mycobacterium tuberculosis</i> F11                                   | N       | Bacteria        | Actinobacteria        | Actinobacteridae        | Actinomycetales        | Mycobacteriaceae        | <i>Mycobacterium</i> | <i>Mycobacterium tuberculosis</i> F11                           |
| gi 194097589 ref NC_011035.1 | <i>Neisseria gonorrhoeae</i> NCCP11945                                  | N       | Bacteria        | Proteobacteria        | β-proteobacteria        | Neisseriales           | Neisseriaceae           | <i>Neisseria</i>     | <i>Neisseria gonorrhoeae</i> NCCP11945                          |
| gi 229587578 ref NC_012660.1 | <i>Pseudomonas fluorescens</i> SBW25                                    | Y       | <b>Bacteria</b> | <b>Proteobacteria</b> | <b>γ-proteobacteria</b> | <b>Pseudomonadales</b> | <b>Pseudomonadaceae</b> | <b>Pseudomonas</b>   | <b><i>Pseudomonas fluorescens</i> SBW25</b>                     |
| gi 21888746 ref NC_011770.1  | <i>Pseudomonas aeruginosa</i> LESB58                                    | N       | Bacteria        | Proteobacteria        | γ-proteobacteria        | Pseudomonadales        | Pseudomonadaceae        | <i>Pseudomonas</i>   | <i>Pseudomonas aeruginosa</i> LESB58                            |
| gi 229586230 ref NC_012633.1 | <i>Rickettsia africae</i> ESF-5 chromosome                              | N       | Bacteria        | Proteobacteria        | α-proteobacteria        | Rickettsiales          | Rickettsiaceae          | <i>Rickettsia</i>    | <i>Rickettsia africae</i> ESF-5                                 |
| gi 116515308 ref NC_008533.1 | <i>Streptococcus pneumoniae</i> D39                                     | N       | Bacteria        | Firmicutes            | Bacilli                 | Lactobacillales        | Streptococcaceae        | <i>Streptococcus</i> | <i>Streptococcus pneumoniae</i> D39                             |
| gi 42519920 ref NC_002978.6  | <i>Wolbachia</i> endosymbiont of <i>Drosophila melanogaster</i>         | N       | Bacteria        | Proteobacteria        | α-proteobacteria        | Rickettsiales          | Anaplasmataceae         | <i>Wolbachia</i>     | <i>Wolbachia</i> endosymbiont of <i>Drosophila melanogaster</i> |
| ...                          |                                                                         |         |                 |                       |                         |                        |                         |                      |                                                                 |

### OTU assignment

| Kingdom  | Phylum         | Class            | Order           | Family           | Genus              |
|----------|----------------|------------------|-----------------|------------------|--------------------|
| Bacteria | Proteobacteria | γ-proteobacteria | Pseudomonadales | Pseudomonadaceae | <b>Pseudomonas</b> |
