# Supplementary material for: Distinguishing potential bacteria-tumor associations from contamination in a secondary data analysis of public cancer genome sequence data
Source: Springer Nature journal article supplement (doi:10.1186/s40168-016-0224-8), 2017-01-25

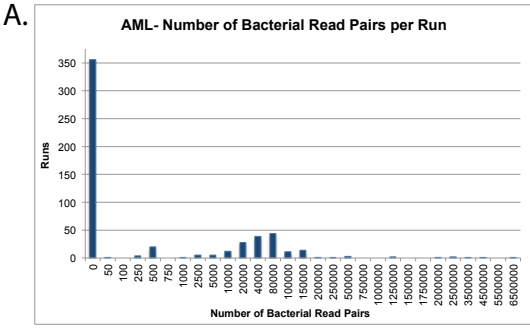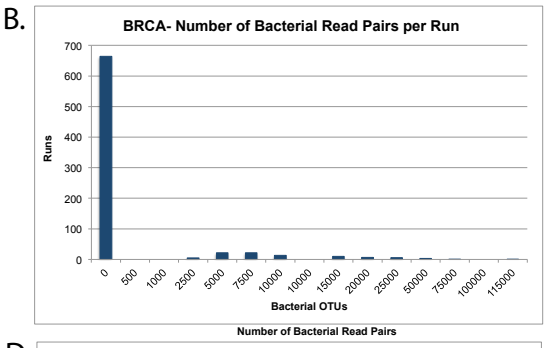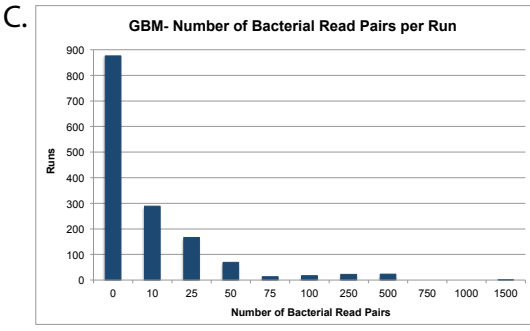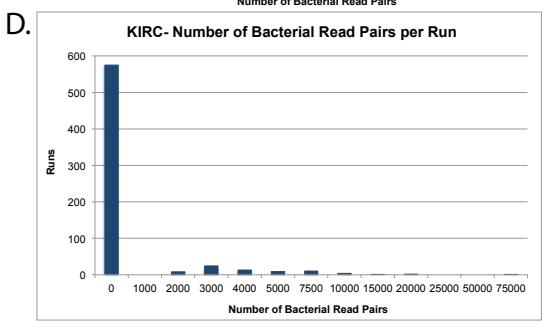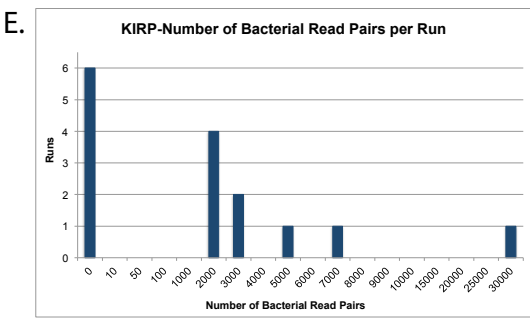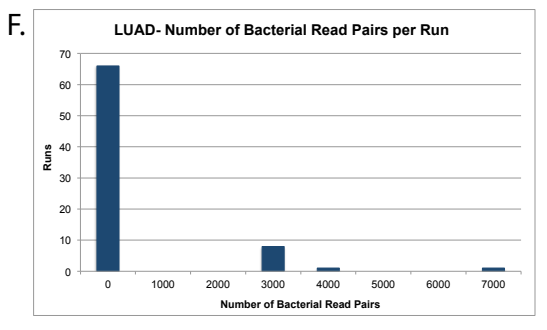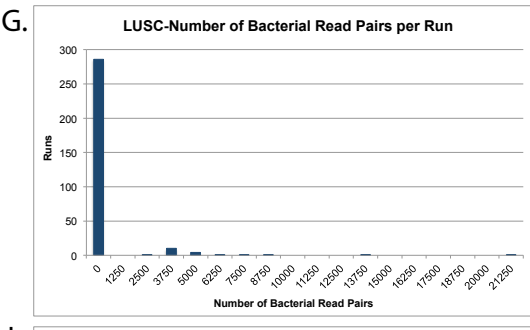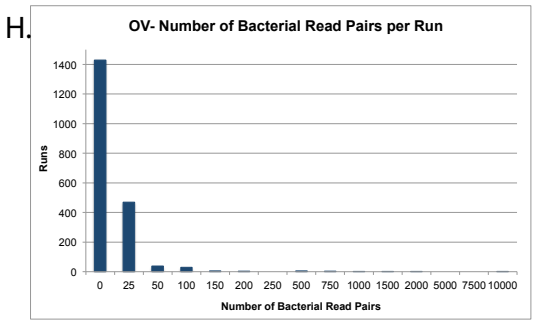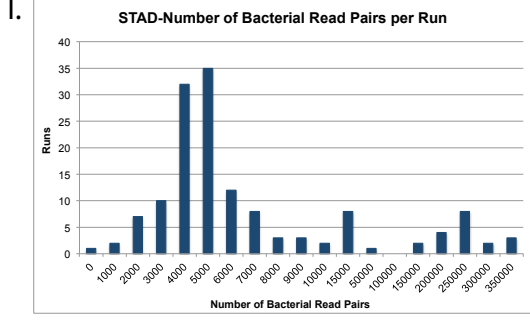

Supplement: 40168_2016_224_MOESM3_ESM.pdf [file 40168_2016_224_MOESM3_ESM.pdf]
