# Supplementary material for: Distinguishing potential bacteria-tumor associations from contamination in a secondary data analysis of public cancer genome sequence data
Source: Springer Nature journal article supplement (doi:10.1186/s40168-016-0224-8), 2017-01-25

### A. RNA-Seq

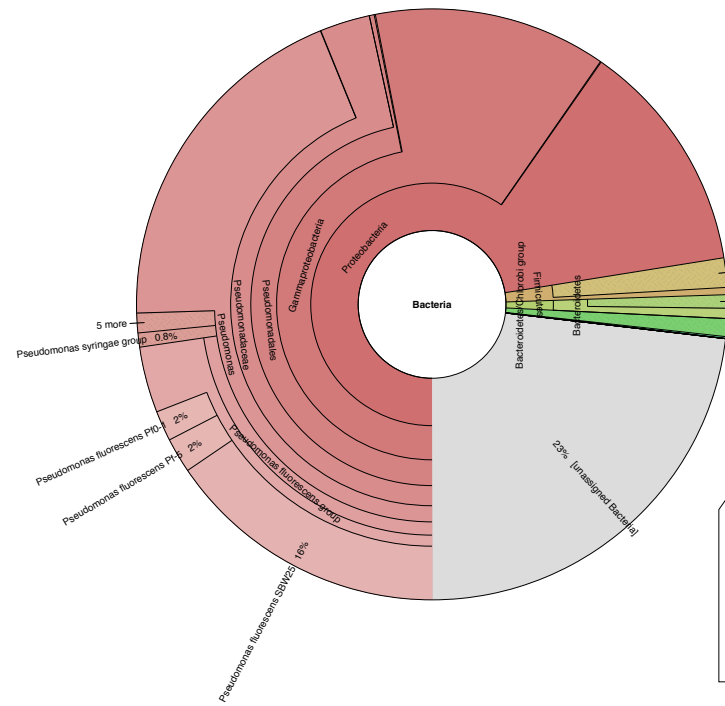

### B. WGS

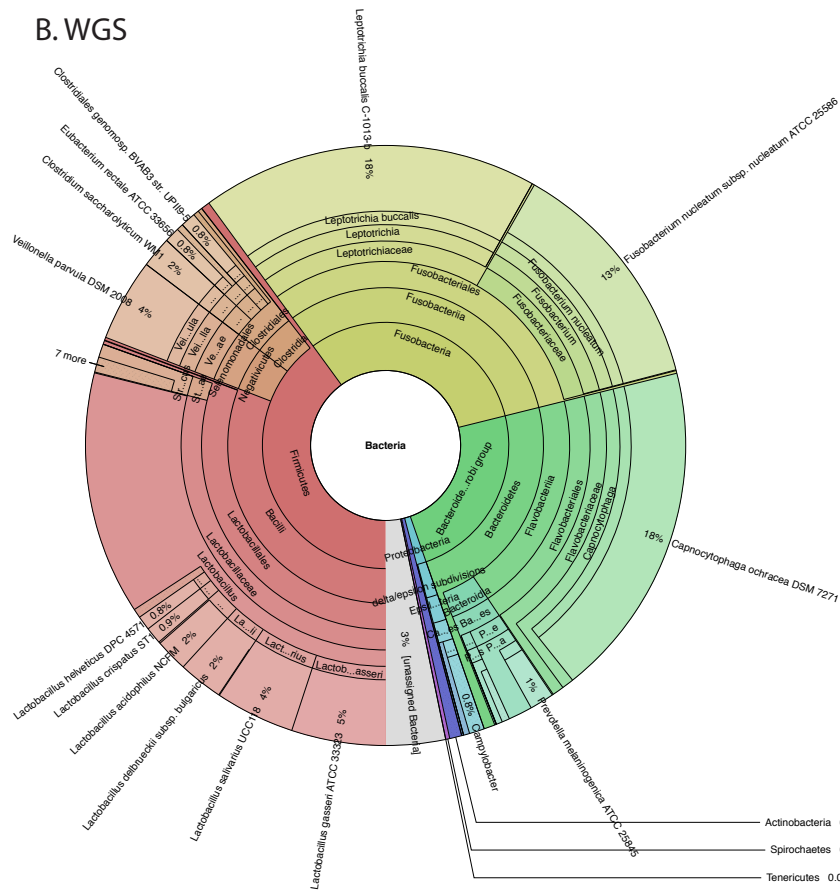

### C. WXS

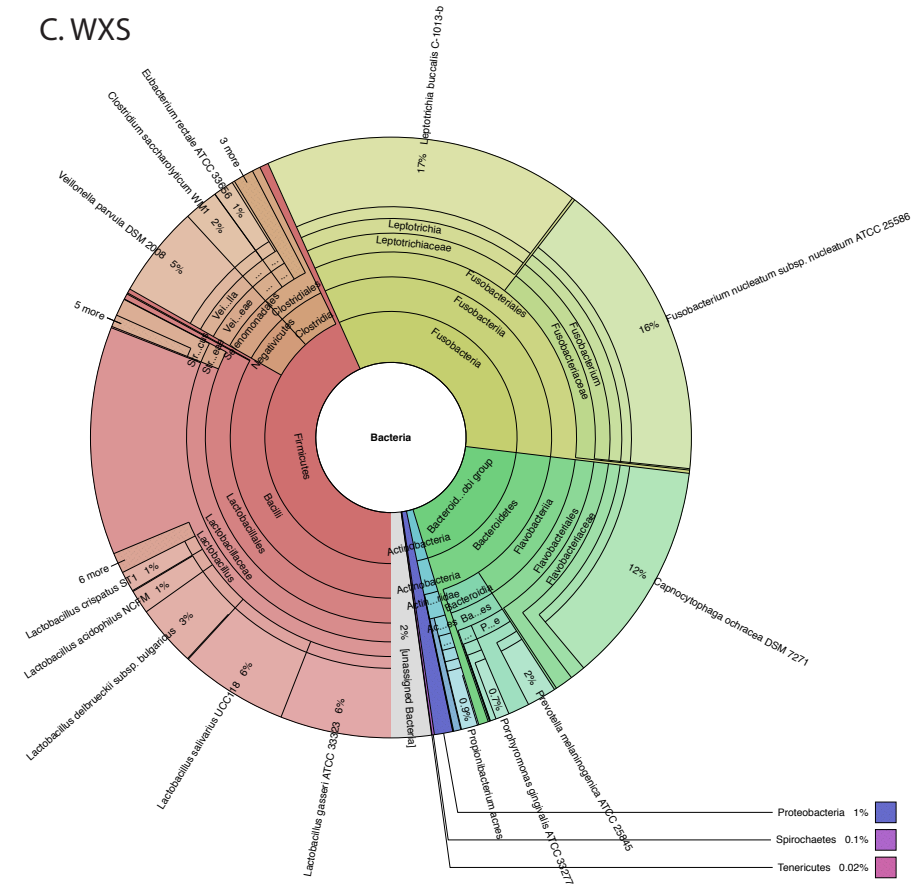

Supplement: 40168_2016_224_MOESM7_ESM.pdf [file 40168_2016_224_MOESM7_ESM.pdf]
